# Supplementary material for: Cytotoxic Effects of Pinnatane A Extracted from Walsura pinnata (Meliaceae) on Human Liver Cancer Cells
Source: PubMed Central journal article supplement (PMC6278294; doi:10.3390/molecules23112733), 2018-10-23
Supplement: molecules-23-02733-s001.pdf [file molecules-23-02733-s001.pdf]

# Cytotoxic Effects of Pinnatane A Extracted from *Walsura pinnata* (Meliaceae) on Human Liver Cancer Cells

Nurhisyam Zakaria <sup>1</sup>; Mohamad Azrul Mahdzir <sup>2</sup>, Mahfuzah Yusoff <sup>3</sup>, Norhafiza Mohd Arshad <sup>4</sup>, Khalijah Awang <sup>2,5</sup>; Noor Hasima Nagoor <sup>1,4,\*</sup>

<sup>1</sup> Institute of Biological Sciences, Faculty of Science, University of Malaya, 50603 Kuala Lumpur Malaysia; nurhisyam2309@gmail.com

<sup>2</sup> Department of Chemistry, Faculty of Science, University of Malaya, 50603 Kuala Lumpur Malaysia; mazrulm89@gmail.com (M.A.M); khalijah@um.edu.my (K.A.)

<sup>3</sup> Centre for Foundation Studies in Science, University of Malaya, 50603 Kuala Lumpur, Malaysia; mahfuzahyusoff@um.edu.my

<sup>4</sup> Centre for Research in Biotechnology for Agriculture (CEBAR), University of Malaya, 50603 Kuala Lumpur Malaysia; hafizaarshad@um.edu.my

<sup>5</sup> Centre of Natural Products and Drug Discovery (CENAR), University of Malaya, 50603 Kuala Lumpur, Malaysia.

\* Correspondence: hasima@um.edu.my; Tel.: +603-7967-5921

| Content:                                                                                                                                            | Page |
|-----------------------------------------------------------------------------------------------------------------------------------------------------|------|
| <b>Table S1:</b> <sup>1</sup> H (600 MHz) and <sup>13</sup> C (150 MHz) Nuclear Magnetic Resonance (NMR) data of pinnatane A in CDCl <sub>3</sub> . | 2    |
| <b>Figure S1:</b> <sup>1</sup> H (600 MHz) NMR spectrum of pinnatane A.                                                                             | 3    |
| <b>Figure S2:</b> <sup>13</sup> C (150 MHz) NMR spectrum of pinnatane A.                                                                            | 3    |
| <b>Figure S3:</b> Distortionless enhancement by polarization transfer -135 (DEPT-135) spectrum of pinnatane A.                                      | 4    |
| <b>Figure S4:</b> Homonuclear correlation spectroscopy (COSY) spectrum of pinnatane A.                                                              | 4    |
| <b>Figure S5:</b> Heteronuclear multiple bond correlation (HMBC) spectrum of pinnatane A.                                                           | 5    |
| <b>Figure S6:</b> Selected COSY and HMBC correlations of pinnatane A.                                                                               | 5    |
| <b>Figure S7:</b> Infrared (IR) spectrum of pinnatane A.                                                                                            | 6    |
| <b>Figure S8:</b> Liquid chromatography–mass spectrometry (LC-MS) spectrum of pinnatane A.                                                          | 7    |
| <b>Related references</b>                                                                                                                           | 7    |

**Table S1:** <sup>1</sup>H (600 MHz) and <sup>13</sup>C (150 MHz) Nuclear Magnetic Resonance (NMR) data of pinnatane A in CDCl<sub>3</sub>.

| Position | Pinnatane A                     |                  | 3 $\beta$ -hydroxy-5-glutinen-28-oic acid<br>(Elfita <i>et al.</i> , 2009) |                  |
|----------|---------------------------------|------------------|----------------------------------------------------------------------------|------------------|
|          | $\delta_H$ (ppm), <i>J</i> (Hz) | $\delta_C$ (ppm) | $\delta_H$ (ppm), <i>J</i> (Hz)                                            | $\delta_C$ (ppm) |
| 1        | 1.45, <i>m</i>                  | 18.3             | 1.44                                                                       | 18.3             |
|          | 1.50, <i>m</i>                  |                  | 1.52                                                                       |                  |
| 2        | 1.67, <i>m</i>                  | 27.8             | 1.67                                                                       | 27.8             |
|          | 1.85, <i>m</i>                  |                  | 1.82                                                                       |                  |
| 3        | 3.47, <i>dd</i> (3.2, 2.3)      | 76.3             | 3.45, <i>br s</i>                                                          | 76.3             |
| 4        | -                               | 40.8             | -                                                                          | 40.8             |
| 5        | -                               | 141.6            | -                                                                          | 141.5            |
| 6        | 5.64, <i>d</i> (5.8)            | 121.7            | 5.6                                                                        | 121.7            |
| 7        | 1.77, <i>m</i>                  | 23.5             | 1.75                                                                       | 23.4             |
|          | 1.95, <i>m</i>                  |                  | 1.95                                                                       |                  |
| 8        | 1.52, <i>m</i>                  | 47.7             | 1.5                                                                        | 47.7             |
| 9        | -                               | 35.1             | -                                                                          | 35.1             |
| 10       | 2.00, <i>m</i>                  | 49.4             | 1.98                                                                       | 49.9             |
| 11       | 1.36, <i>m</i>                  | 34.5             | 1.36                                                                       | 34.5             |
|          | 1.53                            |                  | 1.51                                                                       |                  |
| 12       | 1.39, <i>m</i>                  | 30.9             | 1.35                                                                       | 30.9             |
|          | 1.47, <i>m</i>                  |                  | 1.45                                                                       |                  |
| 13       | -                               | 38.7             | -                                                                          | 38.6             |
| 14       | -                               | 37.2             | -                                                                          | 37.1             |
| 15       | 1.21, <i>m</i>                  | 32.5             | 1.2                                                                        | 32.4             |
|          | 1.25, <i>m</i>                  |                  |                                                                            |                  |
| 16       | 1.50, <i>m</i>                  | 35.8             | 1.48                                                                       | 35.8             |
| 17       | -                               | 44.7             | -                                                                          | 44.7             |
| 18       | 2.43, <i>dd</i> (13.2, 4.5)     | 37.8             | 2.37, <i>dd</i> (13.1, 3.8)                                                | 37.7             |
| 19       | 1.17, <i>m</i>                  | 34.9             | 1.14                                                                       | 34.8             |
|          | 1.31, <i>m</i>                  |                  | 1.29                                                                       |                  |
| 20       | -                               | 28.5             | -                                                                          | 28.5             |
| 21       | 1.47, <i>m</i>                  | 32.8             | 1.46                                                                       | 32.8             |
| 22       | 1.67, <i>m</i>                  | 29.4             | 1.65                                                                       | 29.5             |
|          | 2.29, <i>dd</i> (14.9, 9.7)     |                  | 2.29, <i>dd</i> (14.7, 9.5)                                                |                  |
| 23       | 1.04, <i>s</i>                  | 28.9             | 1.01, <i>s</i>                                                             | 28.9             |
| 24       | 1.14, <i>s</i>                  | 25.4             | 1.12, <i>s</i>                                                             | 25.4             |
| 25       | 0.82, <i>s</i>                  | 15.6             | 0.80, <i>s</i>                                                             | 15.6             |
| 26       | 0.93, <i>s</i>                  | 20.3             | 0.89, <i>s</i>                                                             | 20.3             |
| 27       | 1.04, <i>s</i>                  | 18.2             | 0.96, <i>s</i>                                                             | 18.2             |
| 28       | -                               | 182.6            | -                                                                          | 184.8            |
| 29       | 0.98, <i>s</i>                  | 34.3             | 0.91, <i>s</i>                                                             | 34.3             |
| 30       | 0.94, <i>s</i>                  | 29.8             | 1.01, <i>s</i>                                                             | 29.7             |

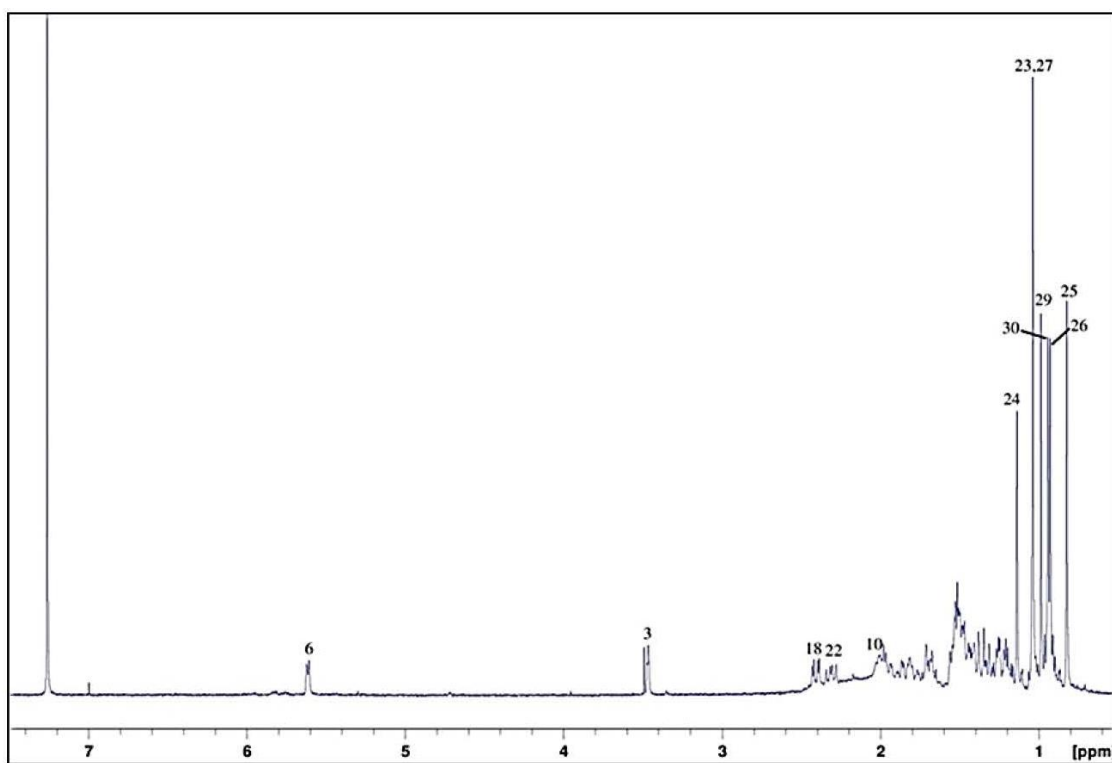

Figure S1:  $^1\text{H}$  (600 MHz) NMR spectrum of pinnatane A.

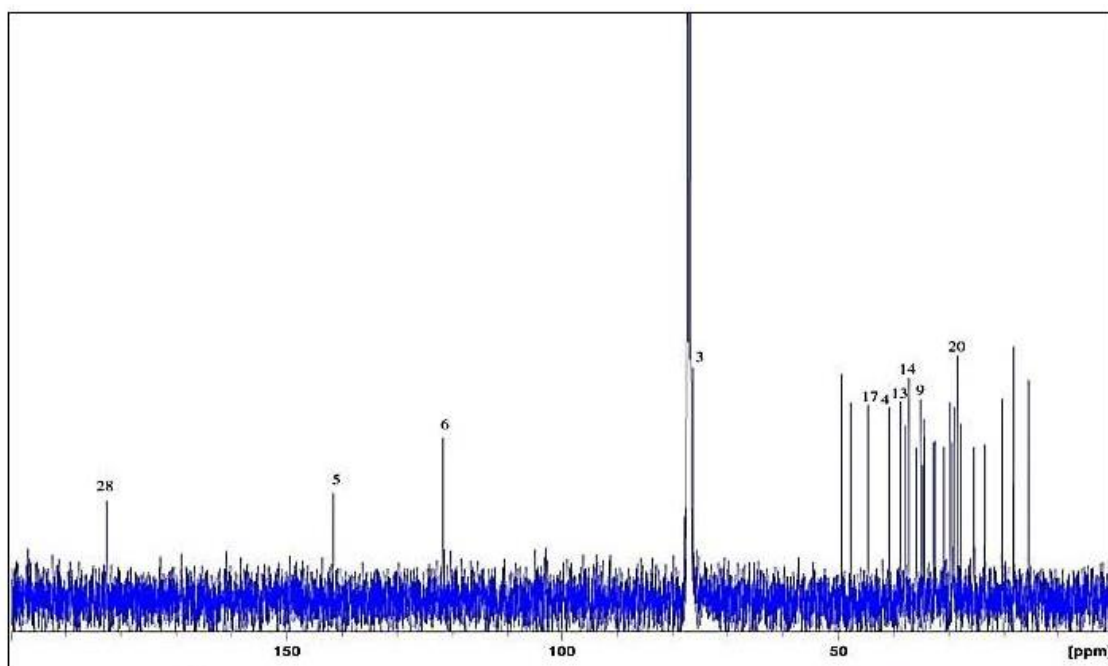

Figure S2:  $^{13}\text{C}$  (150 MHz) NMR spectrum of pinnatane A.

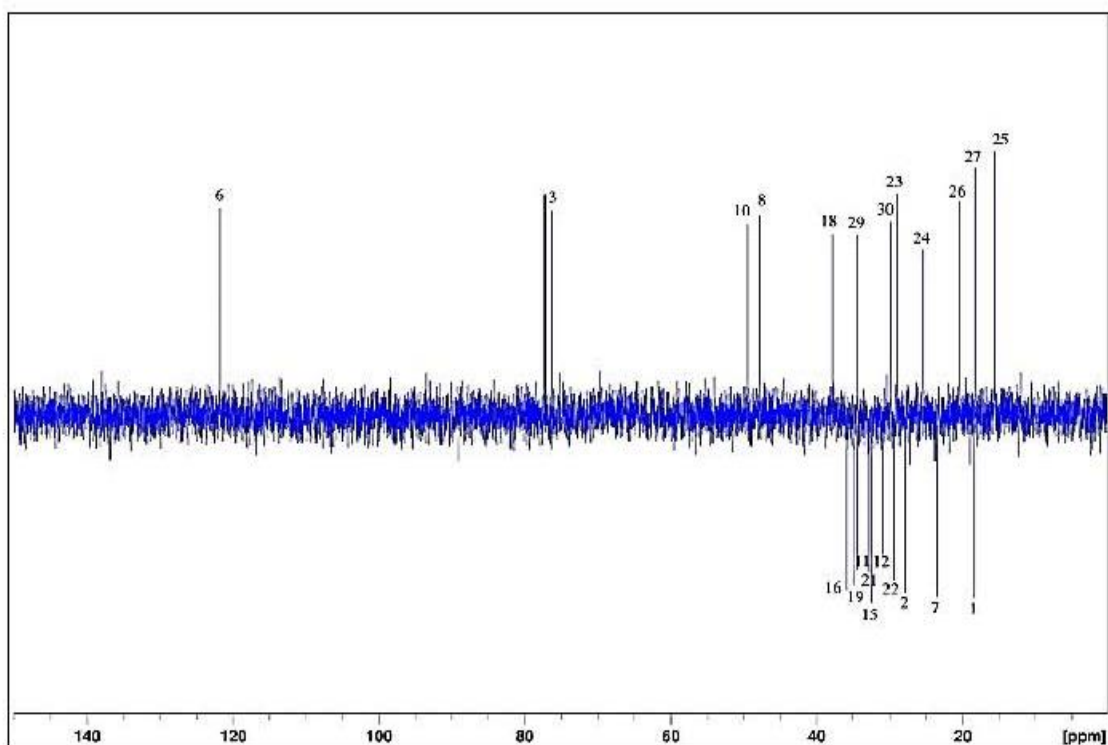

**Figure S3:** Distortionless enhancement by polarization transfer -135 (DEPT-135) spectrum of pinnatane A.

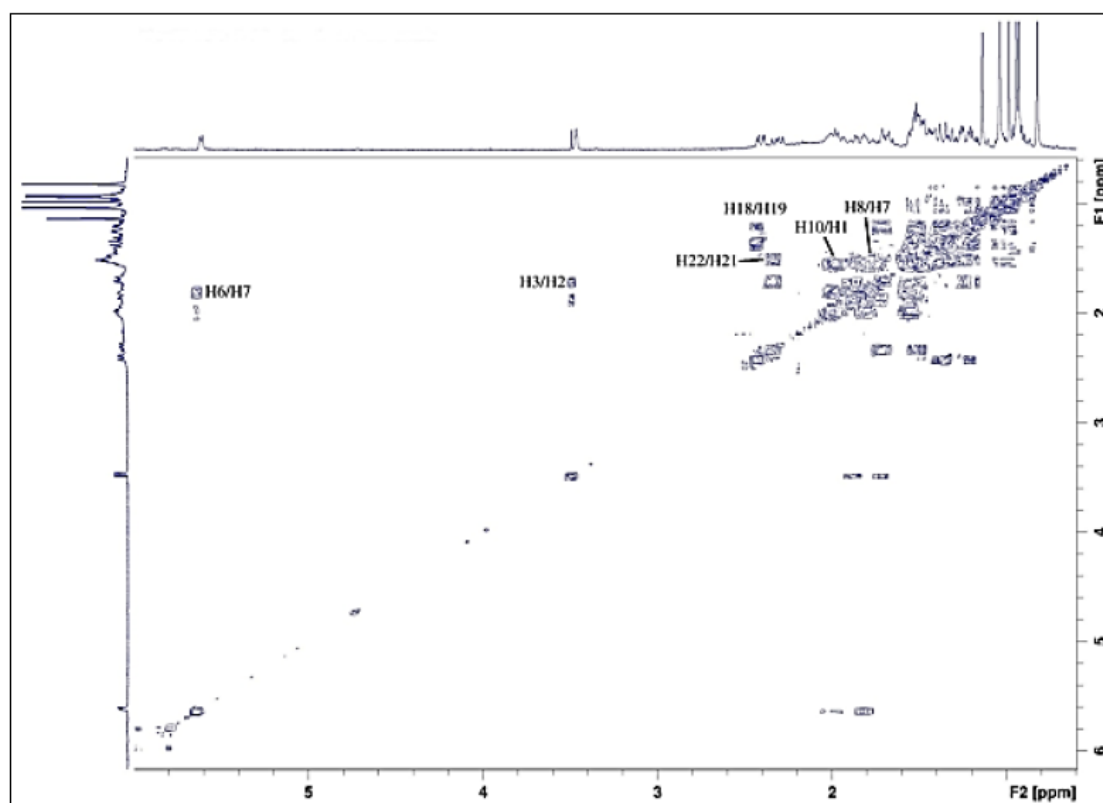

**Figure S4** Homonuclear correlation spectroscopy (COSY) spectrum of pinnatane A.

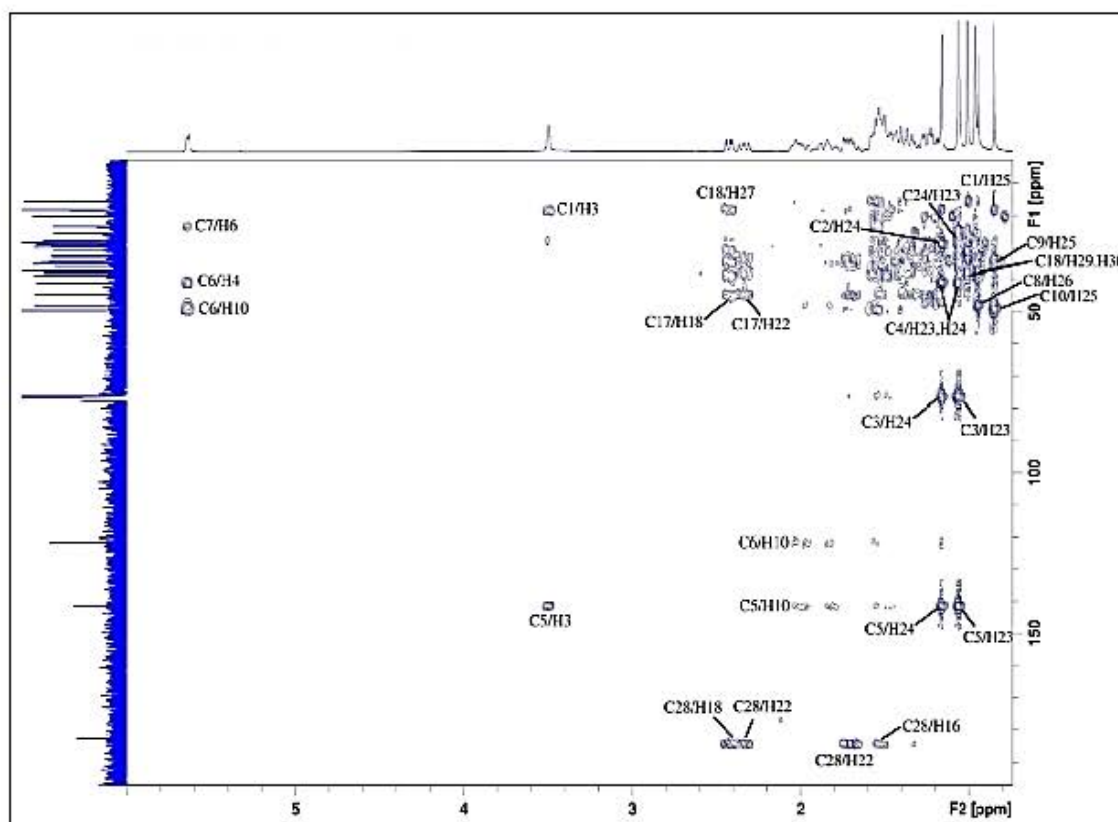

Figure S5: Heteronuclear multiple bond correlation (HMBC) spectrum of pinnatane A.

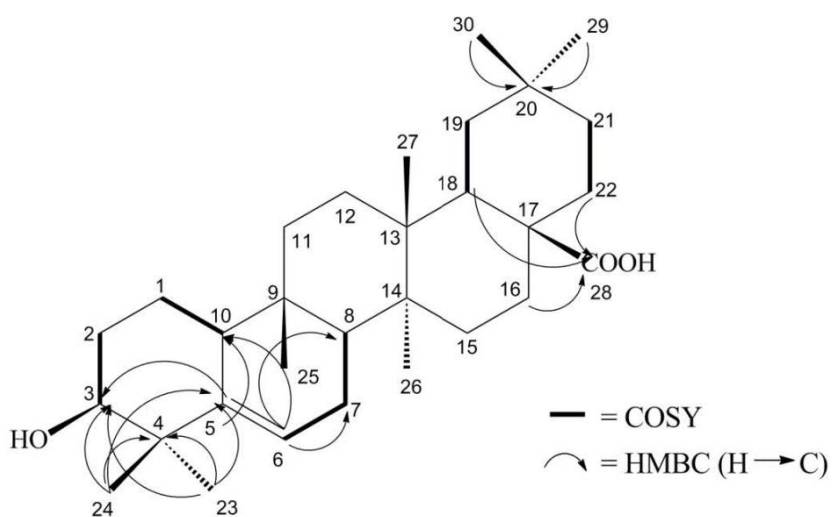

Figure S6: Selected COSY and HMBC correlations of pinnatane A.

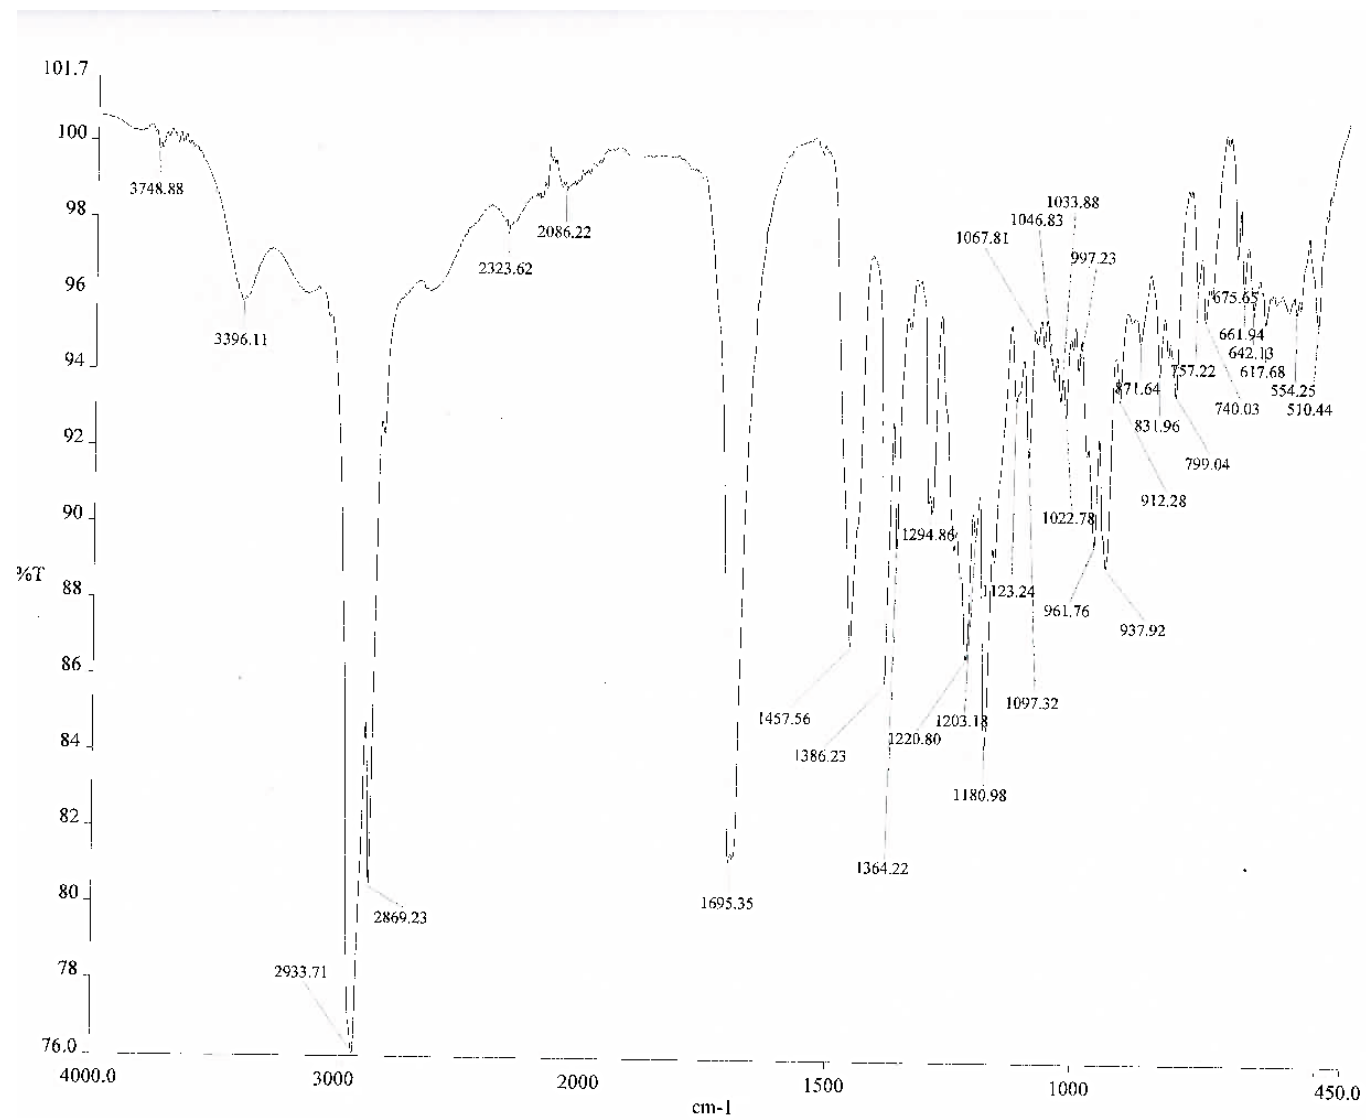

Figure S7: Infrared (IR) spectrum of pinnatane A

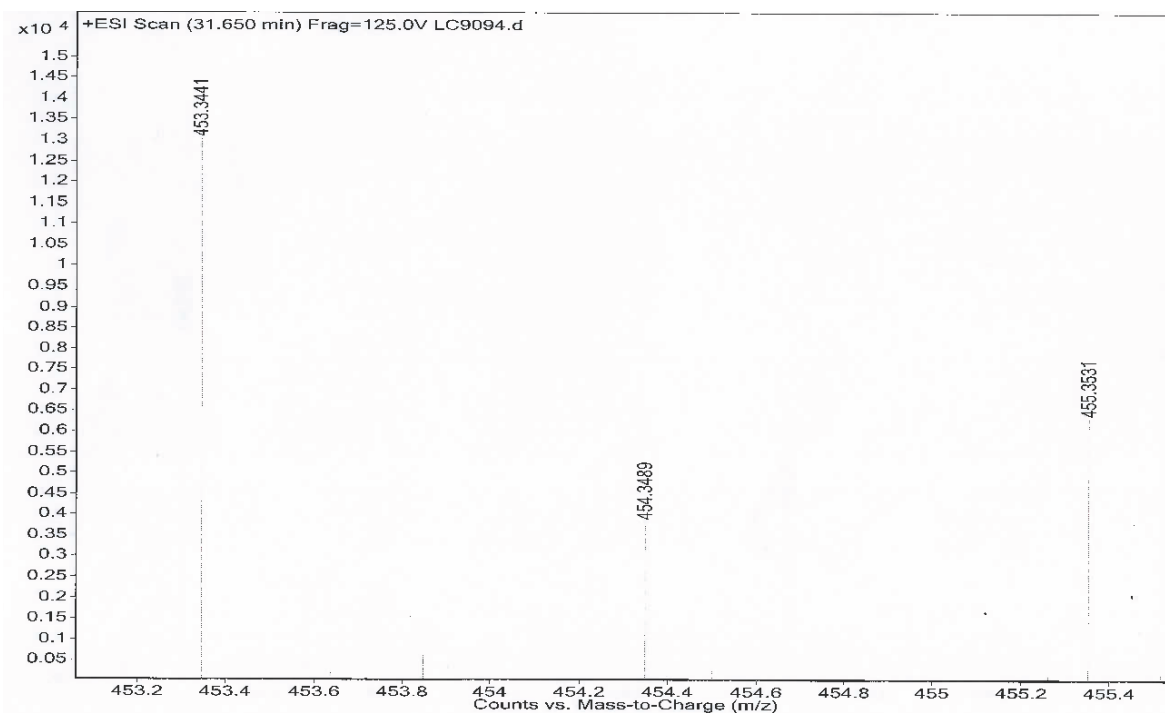

**Figure S8:** Liquid chromatography–mass spectrometry (LC-MS) spectrum of pinnatane A.

Related references:

1. Elfita, E.; Muharni, M.; Latief, M.; Darwati, D.; Widiyantoro, A.; Supriyatna, S.; Bahti, H.H.; Dachriyanus, D.; Cos, P.; Maes, L., et al. Antiplasmodial and other constituents from four Indonesian *Garcinia* spp. *Phytochemistry*, 2009. 70(7): pp. 907-12. DOI: 10.1016/j.phytochem.2009.04.024.
2. Mohamad, K.; Yusoff, M.; Awang, K.; Ahmad, K.; Ng, S.W. Pinnatane A from the bark of *Walsura pinnata* Hassk. *Acta Crystallogr Sect E Struct Rep Online*, 2009. 65(Pt 6): pp. o1317. DOI: 10.1107/s1600536809015955.
3. Yusoff, M. Chemical constituents of *Walsura pinnata* Hassk., in Department of Chemistry. 2012, University of Malaya, Kuala Lumpur, Malaysia (Dissertation). url: <http://studentsrepo.um.edu.my/5775/> (accessed on 15 August 2018). pp. 96-99.
4. Mahdzir, M.A.; Shilpi, J.A.; Mahmud, N.; Ramasamy, S.; Awang, K. Chemical constituents from *Walsura pinnata* (Meliaceae). *Nat Prod Commun*, 2017. 12(9): pp. 1397-1400.
